# MIND TO MIND

Creative writing that explores the abstract side of our profession and our lives

*Stephen T. Harvey, M.D., Editor*

## Objectifying

Nathaniel Joseph Brown, M.D., Ph.D.

A milky white syringe carried you  
and all your thoughts off,  
pausing your life  
as you ascended into the void.  
I easily discarded it, as a matter of routine—  
just cleaning my workspace.  
I had taken it from a crisp, neatly folded blue towel  
and didn't want any clutter.

That syringe, and many more besides,  
lifted, pulled, nudged, and belayed  
you through a temporary oblivion  
so that, at some length for us but in no time  
at all for you, you could discard us  
and un-pause your  
interrupted  
life, taking your time with us as seriously  
as you might a trip to the DMV—  
a necessity, but only because  
someone else said so.

You threw away your black and white wrist band  
and bright-colored tube socks.  
From the look on your face, you'd half-  
forgotten them, and us with them,

Accepted for publication March 31, 2021. Published online first on April 23, 2021. From the Department of Anesthesiology, Rocky Mountain Regional VA Medical Center, University of Colorado School of Medicine, Aurora, Colorado. nathaniel.j.brown@ucdenver.edu.

Permission to reprint granted to the American Society of Anesthesiologists by copyright author/owner. Anesthesiology 2021; 135:186–7. DOI: 10.1097/ALN.0000000000003800

before the trash bag finished rustling.  
They served their purpose and we ours.  
Time to start the important work of the day.  
You said it was coffee  
and a chalk-stained crack in granite  
less than an hour away.

That seems like a bad idea;  
may your protection hold,  
and your partner be vigilant.
